# Supplementary material for: A flexible data-free framework for structure-based de novo drug design with reinforcement learning
Source: Royal Society of Chemistry journal article supplement (doi:10.1039/d3sc04091g), 2023-01-01
Supplement: d3sc04091g1.pdf [file d3sc04091g1.pdf]

## Supporting Information:

# A Flexible Data-Free Framework for Structure-Based De Novo Drug Design with Reinforcement Learning

Hongyan Du<sup>1#</sup>, Dejun Jiang<sup>1#</sup>, Odin Zhang<sup>1</sup>, Zhenxing Wu<sup>1</sup>, Junbo Gao<sup>1</sup>, Xujun Zhang<sup>1</sup>, Xiaorui Wang<sup>2,3</sup>, Yafeng Deng<sup>2</sup>, Yu Kang<sup>1</sup>, Dan Li<sup>1</sup>, Peichen Pan<sup>1\*</sup>, Chang-

Yu Hsieh<sup>1\*</sup>, Tingjun Hou<sup>1\*</sup>

<sup>1</sup>College of Pharmaceutical Sciences, Zhejiang University, Hangzhou 310058, Zhejiang, China

<sup>2</sup>Hangzhou Carbonsilicon AI Technology Co., Ltd, Hangzhou 310018, Zhejiang, China

<sup>3</sup>Dr. Neher's Biophysics Laboratory for Innovative Drug Discovery, State Key Laboratory of Quality Research in Chinese Medicine, Macau Institute for Applied Research in Medicine and Health, Macau University of Science and Technology, Macao, 999078, China.

#Equivalent authors

### Corresponding authors

**Peichen Pan**

**E-mail:** panpeichen@zju.edu.cn

**Tingjun Hou**

**E-mail:** tingjunhou@zju.edu.cn

**Chang-Yu Hsieh**

**E-mail:** kimhsieh@zju.edu.cn

## Fragment Recombination Rules

We adopted the fragment recombination rules as described in the original BRICS<sup>1</sup> paper, which consists of two main steps: First, heavy atoms are classified based on their atomic types, bonding information, and valency. Specific numbers are assigned to each category. Subsequently, the rules for fragment recombination are defined based on chemical reversibility and synthetic feasibility.

We have provided a script called *prepare\_building\_blocks.py* on GitHub for classifying heavy atoms (<https://github.com/Brian-hongyan/3D-MCTS>). The table below lists the recombination rules based on BRICS:

**Table S1.** Recombination Rules according classifications of connection heavy atoms

| Class | 1 | 2 | 3 | 4 | 5 | 6 | 7 | 8 | 9 | 10 | 11 | 12 | 13 | 14 | 15 | 16 |
|-------|---|---|---|---|---|---|---|---|---|----|----|----|----|----|----|----|
| 1     |   | √ | √ |   | √ |   |   |   |   | √  |    |    |    |    |    |    |
| 2     | √ |   |   |   |   |   |   |   |   |    |    |    |    | √  |    |    |
| 3     | √ |   |   | √ |   | √ |   | √ |   |    |    |    | √  | √  | √  | √  |
| 4     |   |   | √ |   | √ |   |   |   |   |    | √  |    |    |    |    |    |
| 5     | √ |   |   | √ |   | √ |   | √ |   |    |    | √  | √  | √  | √  | √  |
| 6     |   |   | √ |   | √ |   |   |   |   | √  |    |    | √  | √  | √  | √  |
| 7     |   |   |   |   |   |   | √ |   |   |    |    |    |    |    |    |    |
| 8     |   |   | √ |   | √ |   |   |   | √ | √  | √  |    | √  | √  | √  | √  |
| 9     |   |   |   |   |   |   |   | √ |   |    |    |    | √  | √  | √  | √  |
| 10    | √ |   |   |   |   | √ |   | √ |   |    |    |    | √  | √  | √  | √  |
| 11    |   |   |   | √ |   |   |   | √ |   |    |    |    | √  | √  | √  | √  |
| 12    |   |   |   |   | √ |   |   |   |   |    |    |    |    |    |    |    |
| 13    |   |   | √ |   | √ | √ |   | √ | √ | √  | √  |    |    | √  | √  | √  |
| 14    |   | √ | √ |   | √ | √ |   | √ | √ | √  | √  |    | √  | √  | √  | √  |
| 15    |   |   | √ |   | √ | √ |   | √ | √ | √  | √  |    | √  | √  |    | √  |
| 16    |   |   | √ |   | √ | √ |   | √ | √ | √  | √  |    | √  | √  | √  | √  |

The numbers represent classification of heavy atoms. A checkmark in the table indicates that the corresponding two categories meet the recombination rules.

## References

1. J. Degen, C. Wegscheid-Gerlach, A. Zaliani and M. Rarey, *Chemmedchem*, 2008, **3**, 1503-1507.
